# Supplementary material for: Vestiges of an Ancient Border in the Contemporary Genetic Diversity of North-Eastern Europe
Source: PubMed Central journal article supplement (PMC4488853; doi:10.1371/journal.pone.0130331), 2015-07-01
Supplement: pone.0130331.s002.pdf [file pone.0130331.s002.pdf]

**S1 Table.** Complete Finnish mitochondrial sequences (N = 367) analyzed in the study.

| <b>GenBank accession no</b>                                                                                                                                                                            | <b>N</b> | <b>Origin</b>    | <b>Reference</b>                                                                                                                                                                                                                                                                                                                                                                                                                                                                       |
|--------------------------------------------------------------------------------------------------------------------------------------------------------------------------------------------------------|----------|------------------|----------------------------------------------------------------------------------------------------------------------------------------------------------------------------------------------------------------------------------------------------------------------------------------------------------------------------------------------------------------------------------------------------------------------------------------------------------------------------------------|
| <b>AY339402–AY339593</b>                                                                                                                                                                               | 192      | Central Finland  | Finnilä S, Lehtonen MS, Majamaa K (2001) Phylogenetic network for European mtDNA. <i>AJHG</i> 68:1475-1484                                                                                                                                                                                                                                                                                                                                                                             |
| <b>JX171078–JX171140</b>                                                                                                                                                                               | 63       | Northern Finland | Soini HK, Moilanen JS, Finnilä S, Majamaa K (2012) Mitochondrial DNA sequence variation in Finnish patients with matrilinear diabetes mellitus. <i>BioMed Central Research Notes</i> 5:350–361                                                                                                                                                                                                                                                                                         |
| <b>EU753433, EU784076, FJ543390, FJ801039, GQ176284, GU206811, GU391321, GU949563, HM116534, HM856585, HQ022823, HQ658464, HQ840516, JF298814, JF813785, JF813786, JF903928, AY195773*, JF837819**</b> | 19       | Finland          | Greenspan, B. Submitted Family Tree DNA - Genealogy by Genetics, Ltd., 1445 North Loop West, Suite 820, Houston, TX 77008, USA.<br><br>*Mishmar D, Ruiz-Pesini E, Golik P, Macaulay V, Clark AG et al. (2003) Natural selection shaped regional mtDNA variation in humans. <i>Proc. Natl. Acad. Sci. U.S.A.</i> 100: 171-176.<br><br>** Pike DA, Barton TJ, Bauer SL, Kipp E (2010) MtDNA haplogroup T phylogeny based on full mitochondrial sequences. <i>J Genet Geneal</i> 6: 1-24. |
| <b>n/a</b>                                                                                                                                                                                             | 93       | Finland          | 1000 Genomes Project Consortium 2012                                                                                                                                                                                                                                                                                                                                                                                                                                                   |
