# Supplementary material for: Vestiges of an Ancient Border in the Contemporary Genetic Diversity of North-Eastern Europe
Source: PubMed Central journal article supplement (PMC4488853; doi:10.1371/journal.pone.0130331), 2015-07-01
Supplement: pone.0130331.s005.pdf [file pone.0130331.s005.pdf]

**S4 Table.** Main haplogroup frequencies in Finland estimated from complete mtDNA and HV1+2 data sets.

| <b>Haplogroup</b>       | <b>Complete</b> |          | <b>HV1+2</b> |          |
|-------------------------|-----------------|----------|--------------|----------|
|                         | <b>N</b>        | <b>%</b> | <b>N</b>     | <b>%</b> |
| <b>H</b>                | 94              | 25.6     | 276          | 33.2     |
| <b>&gt;H1</b>           | 45              | 12.3     | 94           | 11.3     |
| <b>HV</b>               | 1               | 0.3      | 5            | 0.6      |
| <b>I</b>                | 18              | 4.9      | 10           | 1.2      |
| <b>J</b>                | 28              | 7.6      | 46           | 5.5      |
| <b>K</b>                | 23              | 6.3      | 46           | 5.5      |
| <b>R</b>                | 1               | 0.3      | 6            | 0.7      |
| <b>T</b>                | 20              | 5.4      | 51           | 6.1      |
| <b>U</b>                | 86              | 23.4     | 202          | 24.3     |
| <b>&gt;U5</b>           | 68              | 18.5     | 175          | 21.0     |
| <b>&gt;&gt;U5a</b>      | 20              | 5.5      | 53           | 6.4      |
| <b>&gt;&gt;U5b</b>      | 48              | 13.1     | 122          | 14.7     |
| <b>V</b>                | 40              | 10.9     | 30           | 3.6      |
| <b>&gt;V1</b>           | 17              | 4.6      | 9            | 1.1      |
| <b>&gt;V7</b>           | 9               | 2.5      | 14           | 1.7      |
| <b>W</b>                | 42              | 11.4     | 31           | 3.7      |
| <b>X</b>                | 5               | 1.4      | 15           | 1.8      |
| <b>Z</b>                | 9               | 2.5      | 4            | 0.5      |
| <b>Others/undefined</b> | -               | -        | 110          | 13.2     |
| <b>Total</b>            | 367             | 100.0    | 832          | 100.0    |
